# Supplementary material for: Home Range, Movement and Activity Patterns of Six vulture Species Using Satellite Telemetry in Saurashtra landscape, Gujarat, India
Source: MDPI journal article supplement (doi:10.3390/ecologies3040035), 2022-10-18
Supplement: s1 [file s1]

**Supplementary Material S3:** Home range polygons of IV1, IV2, IV3, WRV1, WRV2, RHV, EV, HG, and EUG tagged in Saurashtra Landscape, Gujarat, India

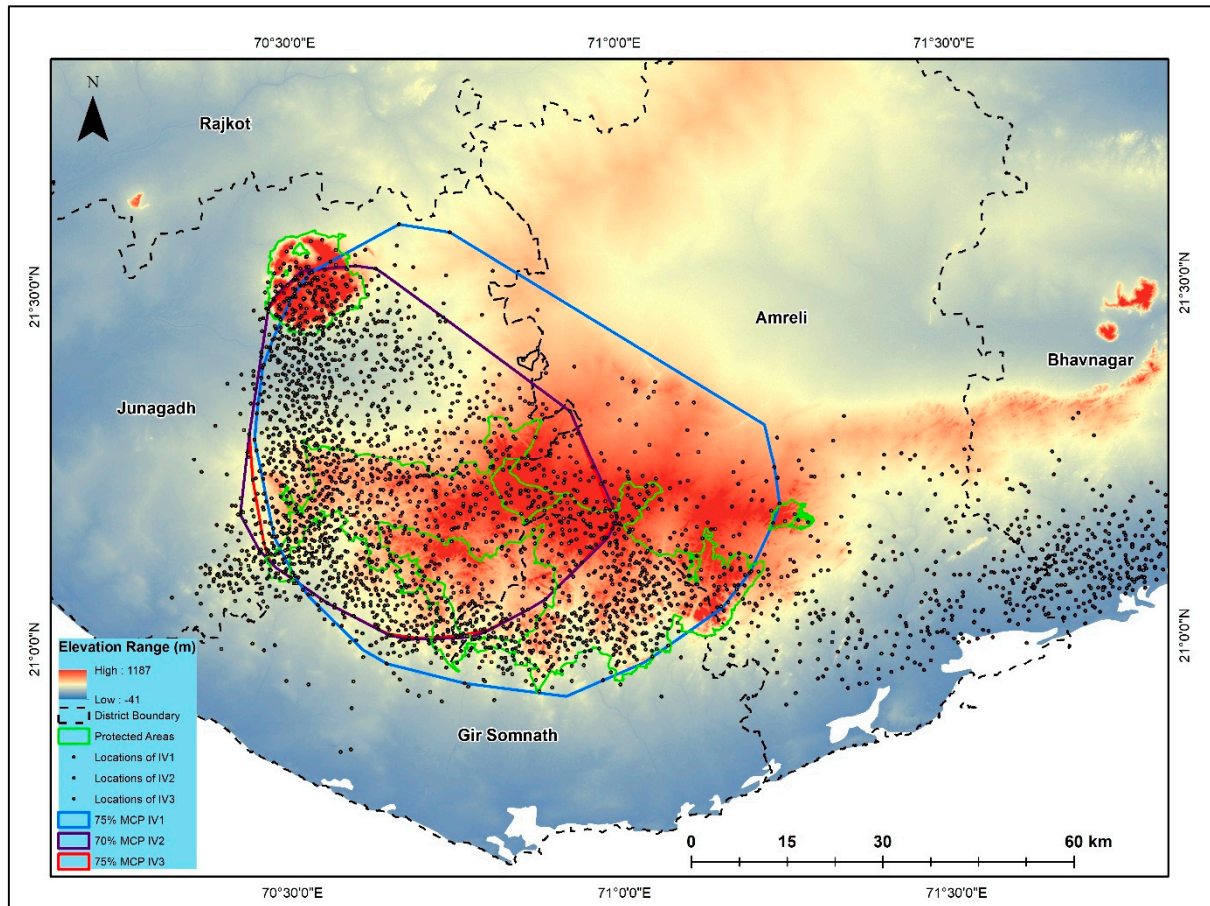

**Figure S4** Minimum convex polygon (MCP) home ranges of Indian Vulture-1 (IV1), Indian Vulture-2 (IV2), and Indian Vulture-3 (IV3) calculated at 75%, 70% and 75%. The polygons for IV1, and IV3 were calculated for one year (November 2020 to November 2021) while as for IV2, the polygons were calculated from November 2020 to May 2021.

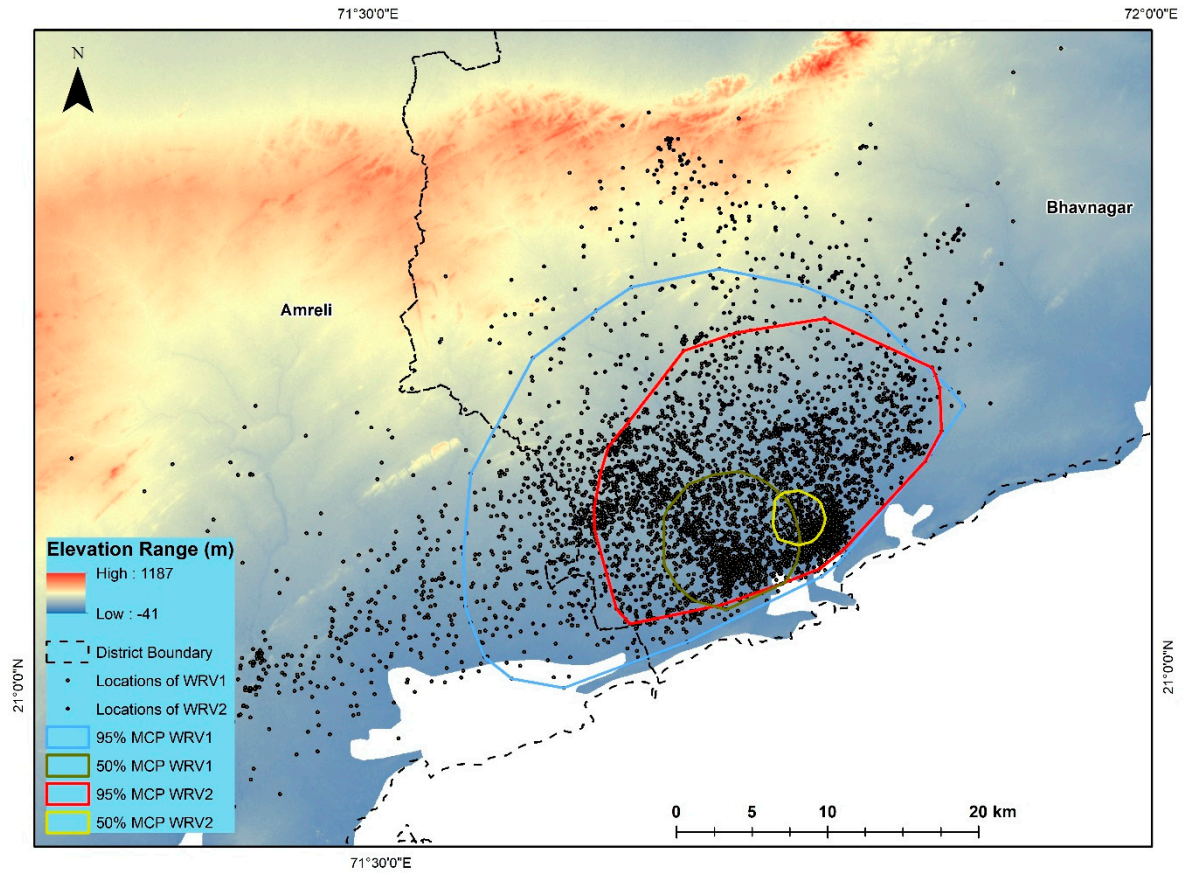

Figure S5 Minimum convex polygon (MCP) home ranges of the White-rumped Vulture-1 (WRV1) and White-rumped Vulture-2 (WRV2) calculated at 95% level. The polygons for WRV1 were calculated for one year (November 2020 to November 2021) and from November 2020 to May 2021 for WRV2.

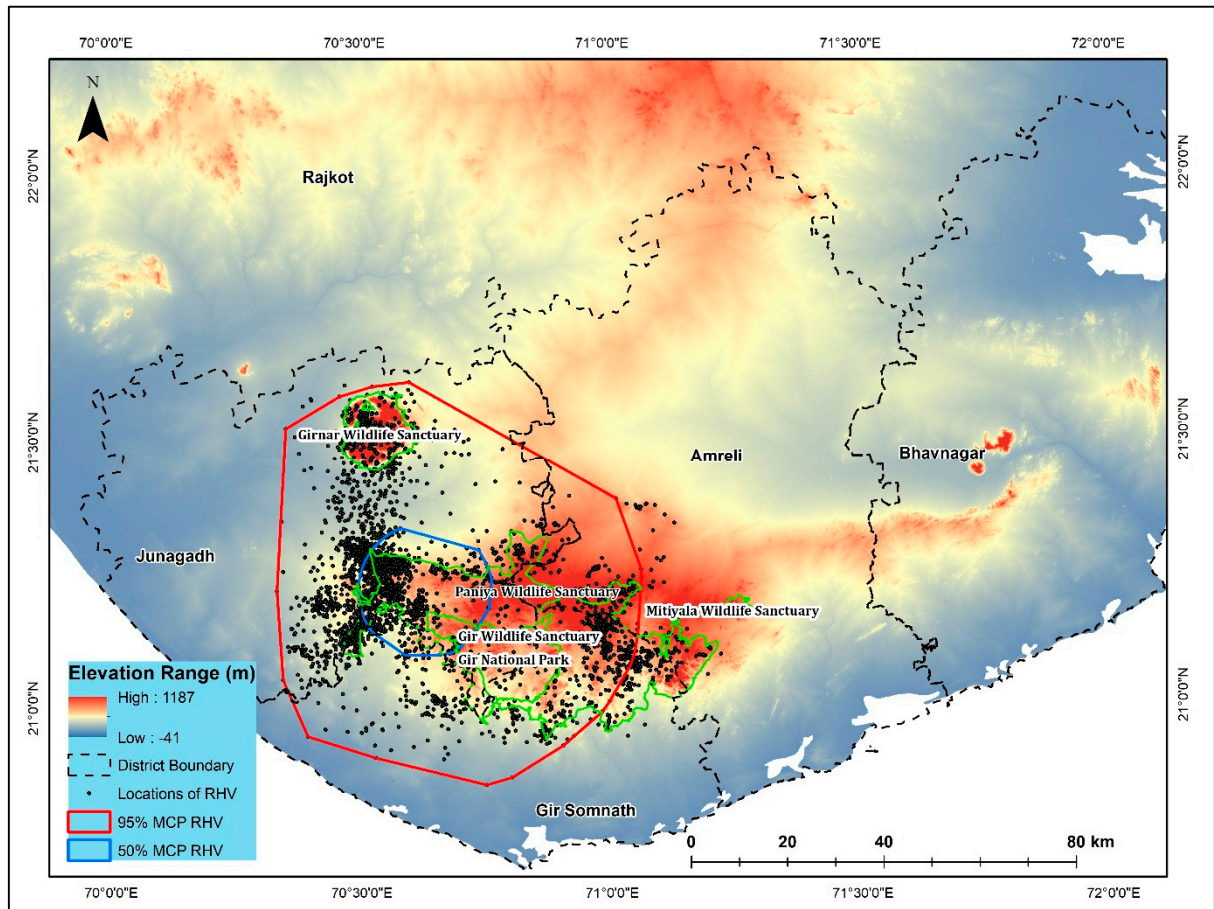

**Figure S6** Minimum convex polygon (MCP) home range of Red-headed Vulture (RHV) calculated at 95% and 50% level from October 2020 to November 2021.



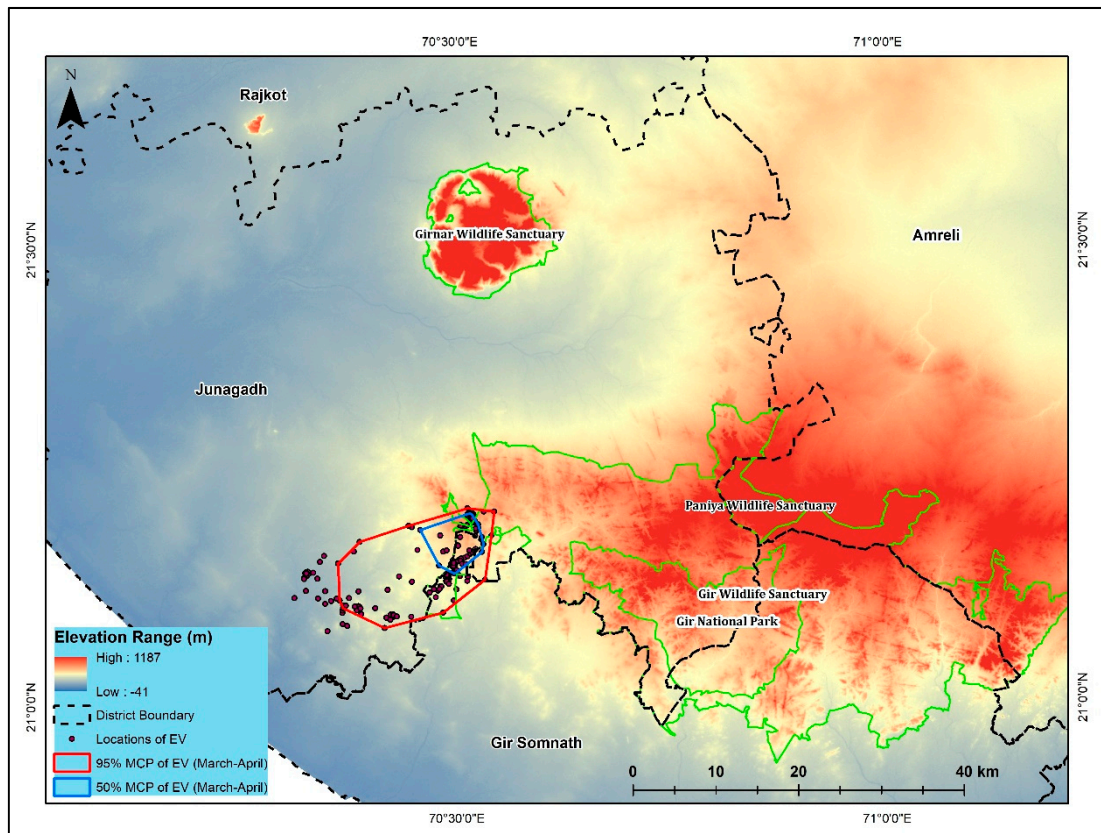

**Figure S7** Minimum convex polygon (MCP) home range of Egyptian Vulture (EV) calculated at 95% and 50% level from February to March 2021.

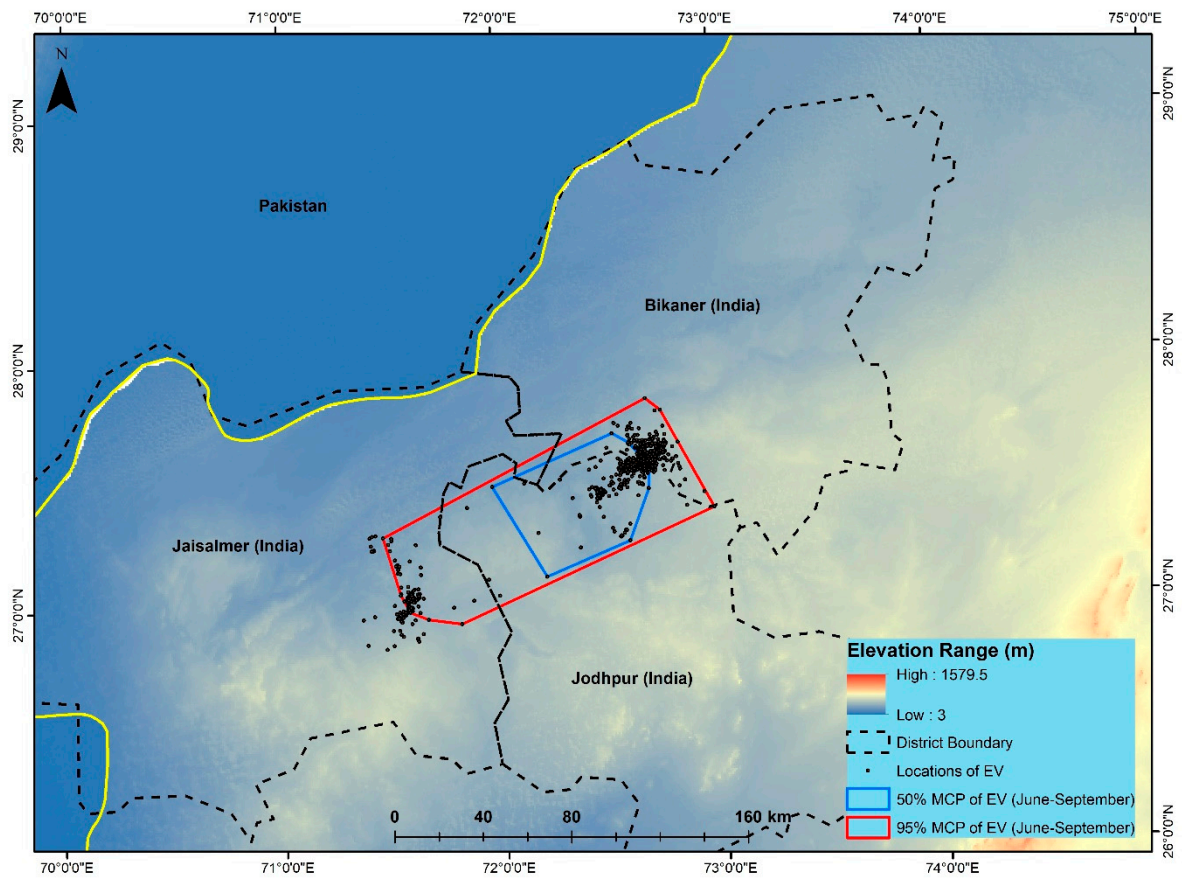

**Figure S8** Minimum convex polygon (MCP) home range of Egyptian Vulture (EV) calculated at 95% and 50% levels in Rajasthan from June to September 2021.

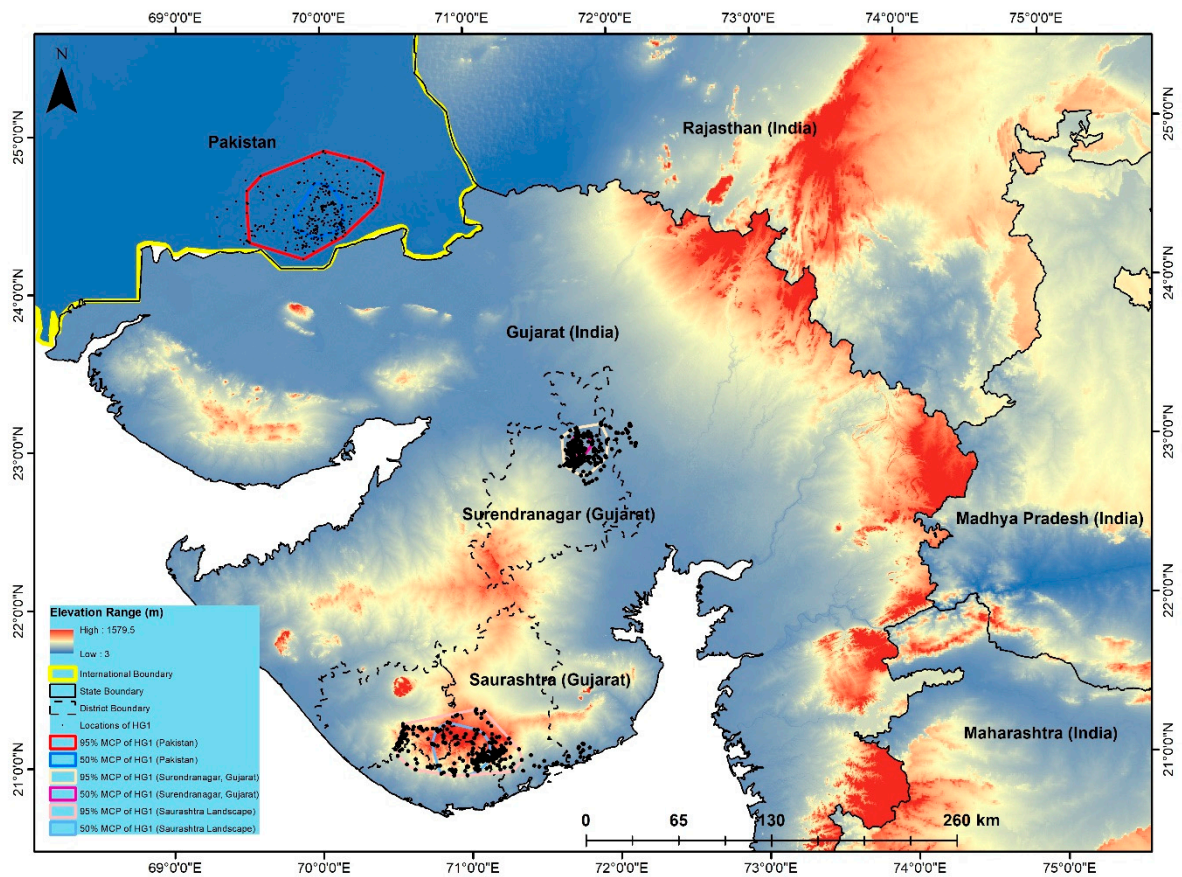

**Figure S9** Minimum convex polygon (MCP) home range of Himalayan Griffon-1 (HG1) calculated at 95% and 50% levels in Gujarat state (India), and Pakistan for January to March 2021.



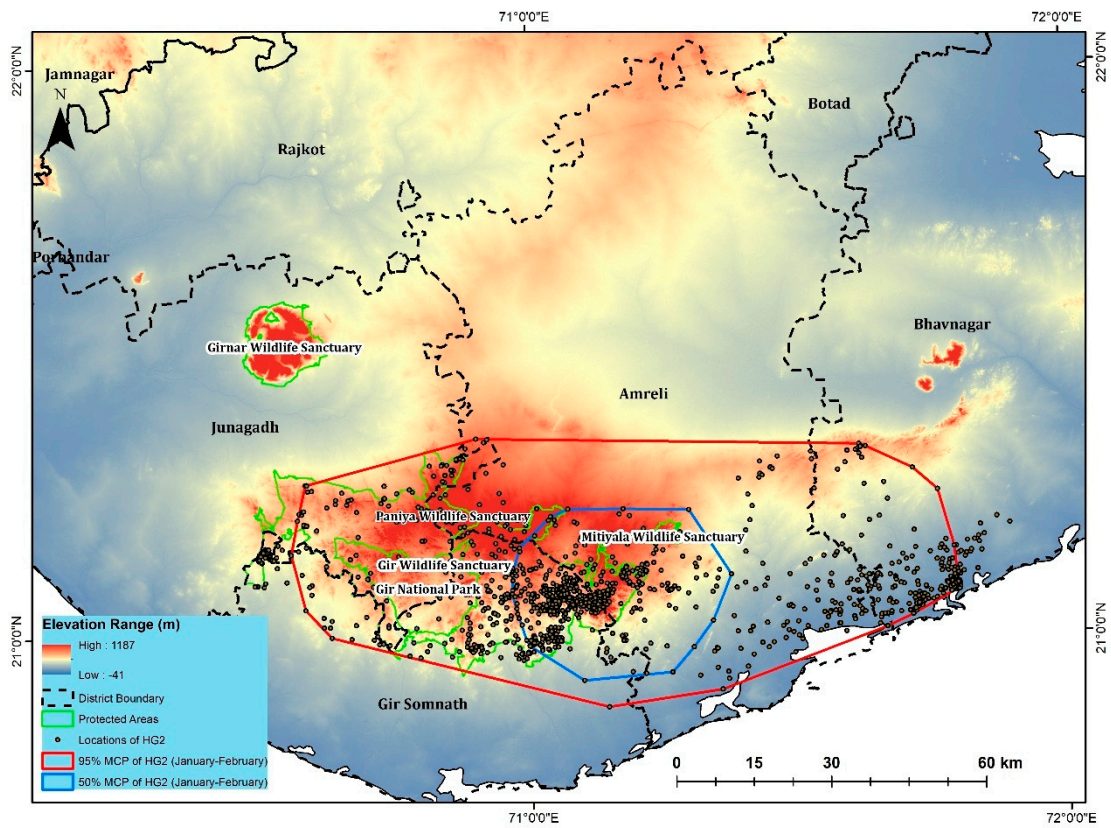

**Figure S10** Minimum convex polygon (MCP) home range of Himalayan Griffon-2 (EUG2) calculated at 95% and 50% levels in Saurashtra, Gujarat during winter season (January to February 2021).

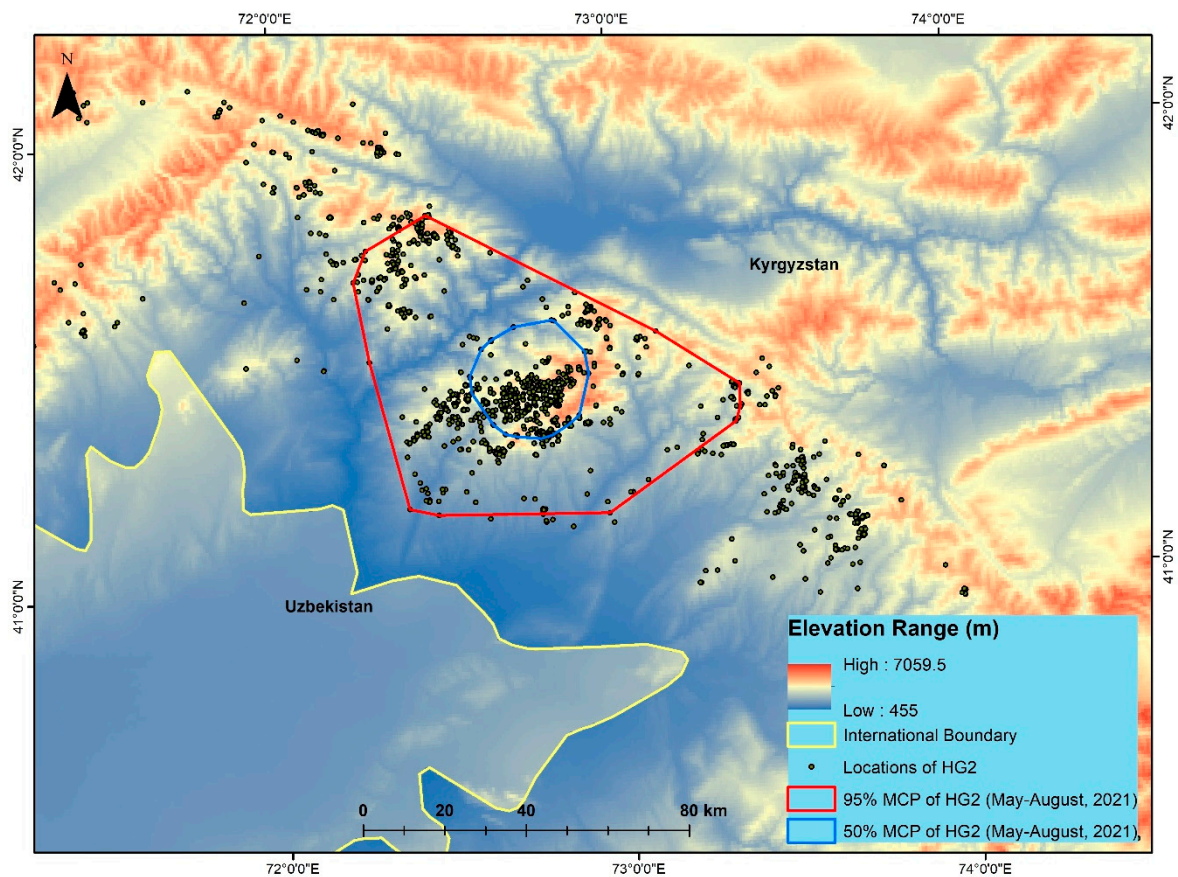

**Figure S11** Minimum convex polygon (MCP) home range of Himalayan Griffon-2 (HG2) calculated at 95% and 50% in Kyrgyzstan during summer season (May to August 2021).



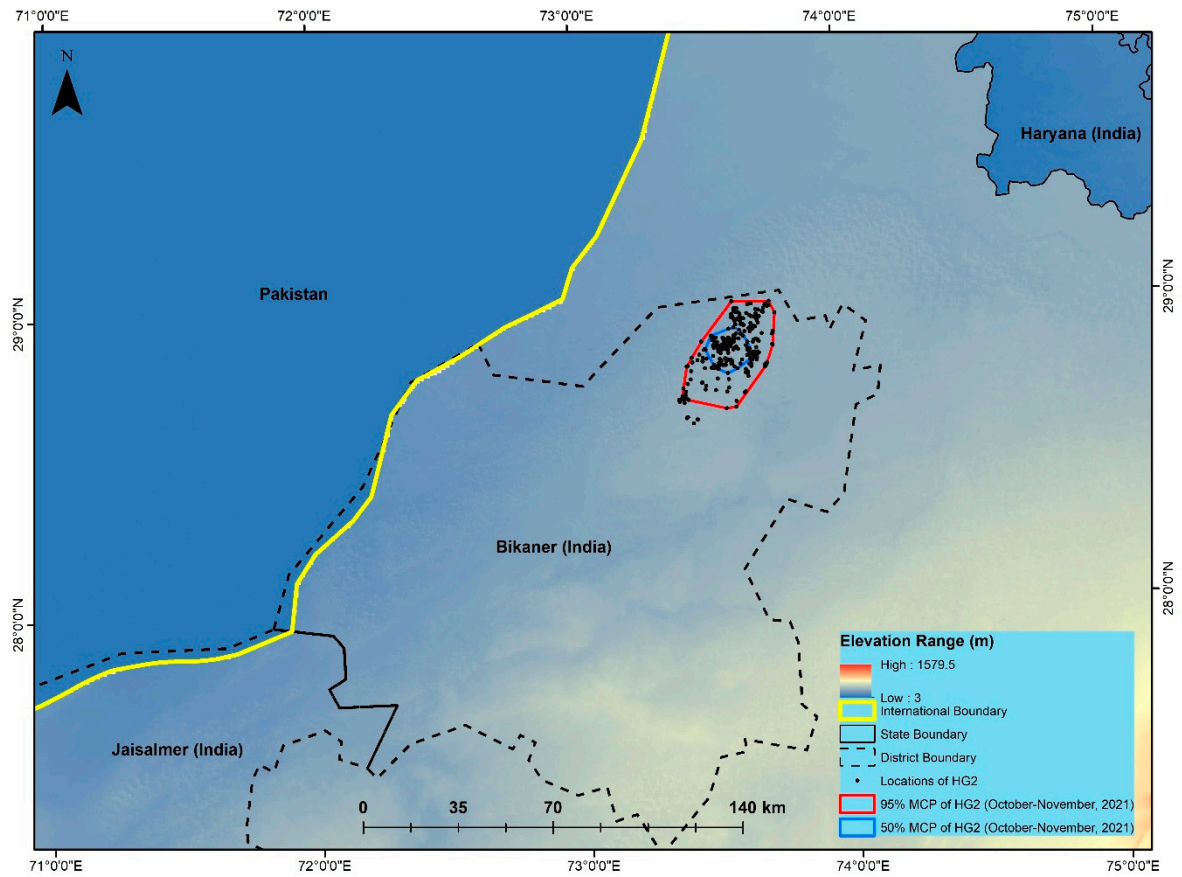

**Figure S12** Minimum convex polygon (MCP) home range of Himalayan Griffon-2 (HG2) calculated at 95% and 50% in Rajasthan during from October to November 2021.

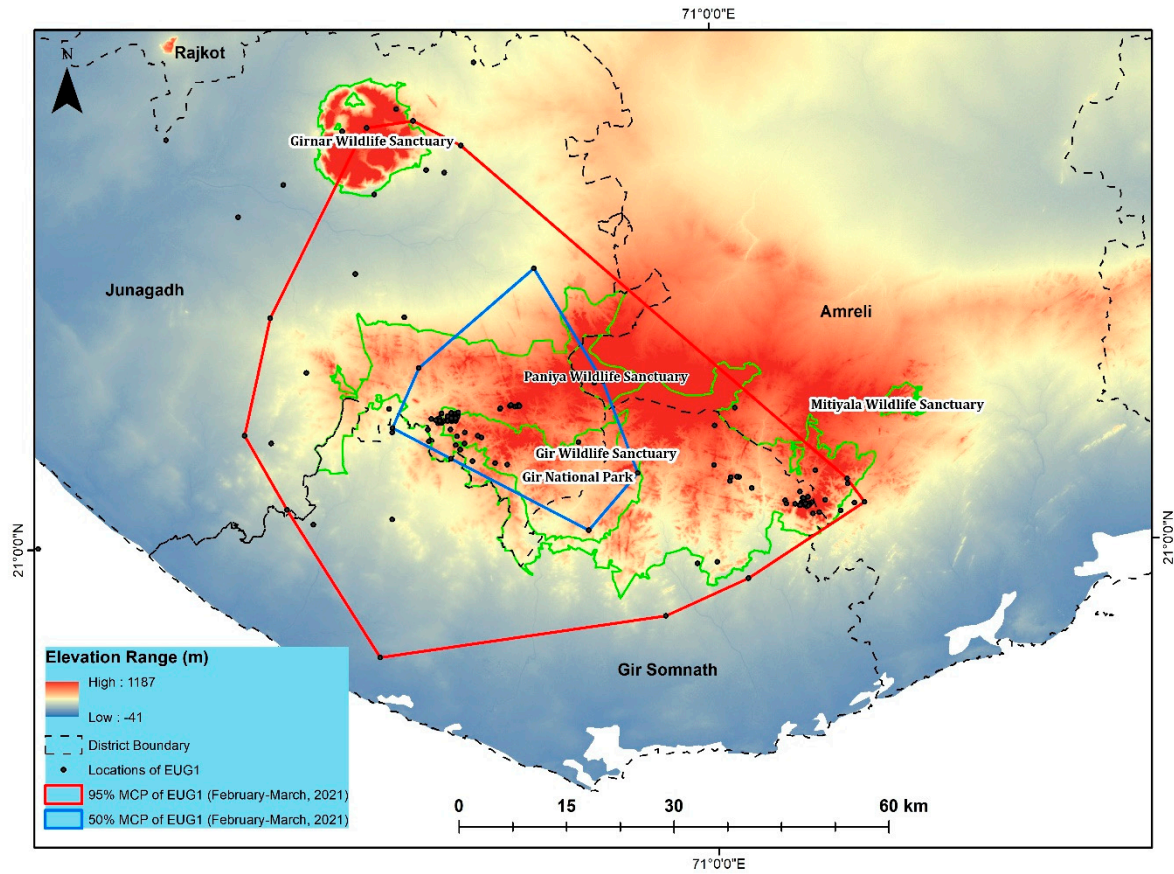

**Figure S13** Minimum convex polygon (MCP) home range of Eurasian Griffon-1 (EUG1) calculated at 95% and 50% in Saurashtra Gujarat from February to March 2021.

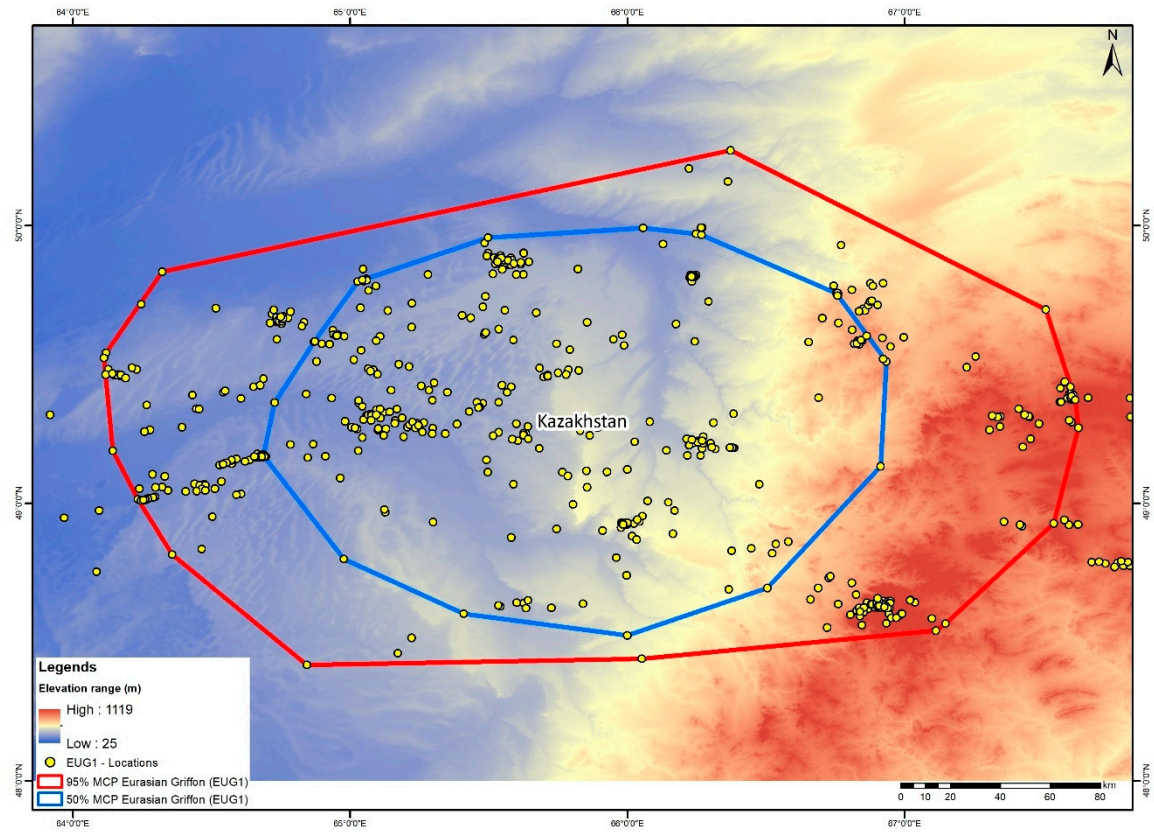

**Figure S14** Minimum convex polygon (MCP) home range of Eurasian Griffon-1 (EUG1) calculated at 95% and 50% in Kazakhstan during summer season (May to July 2021).



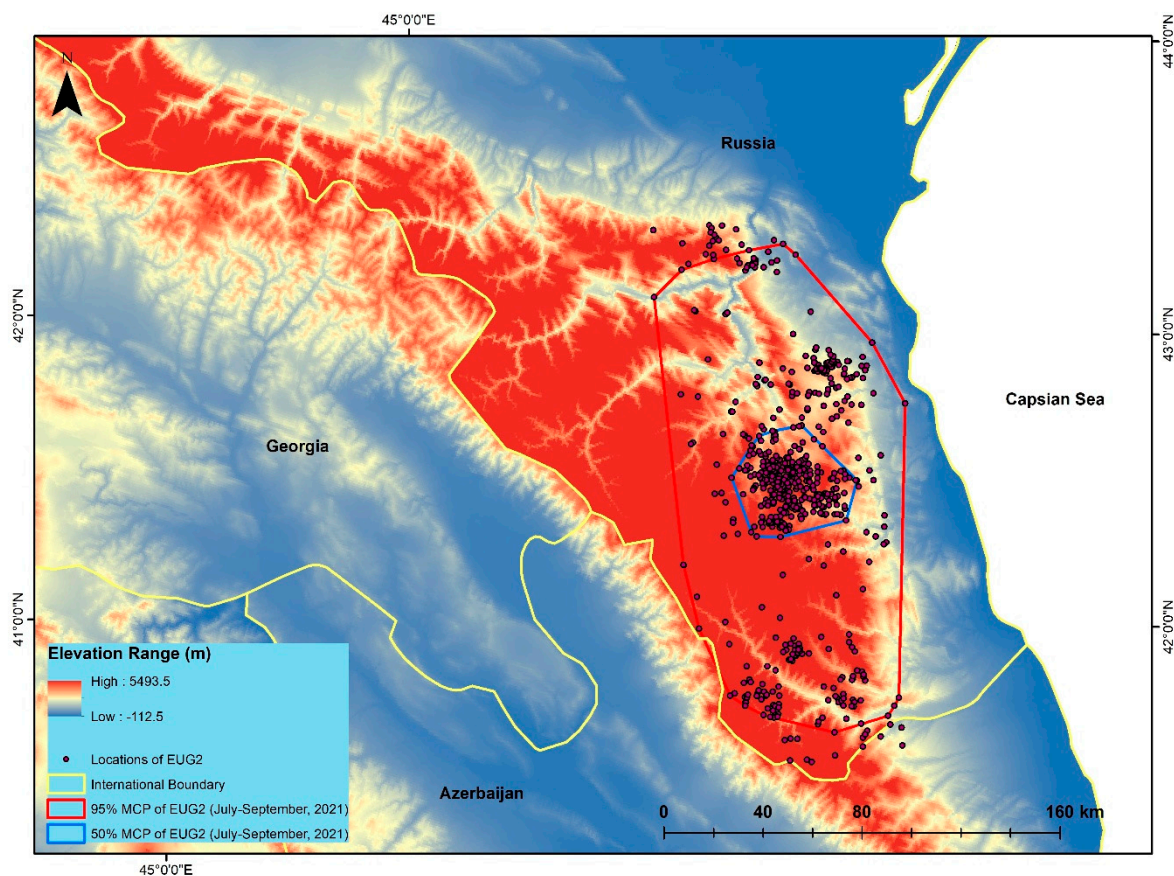

**Figure S15** Minimum convex polygon (MCP) home range of Eurasian Griffon-2 (EUG2) calculated at 95% and 50% in Russia during summer season (June to August 2021).

\*\*\*
