# Supplementary material for: Home Range, Movement and Activity Patterns of Six vulture Species Using Satellite Telemetry in Saurashtra landscape, Gujarat, India
Source: MDPI journal article supplement (doi:10.3390/ecologies3040035), 2022-10-18
Supplement: s1 [file s1]

**Supplementary Material S2:** The plots of home-range size versus home-range level for white-rumped vulture (WRV1, Fig.1) and (WRV2, Fig.2) and red-headed vulture (Fig. 3).

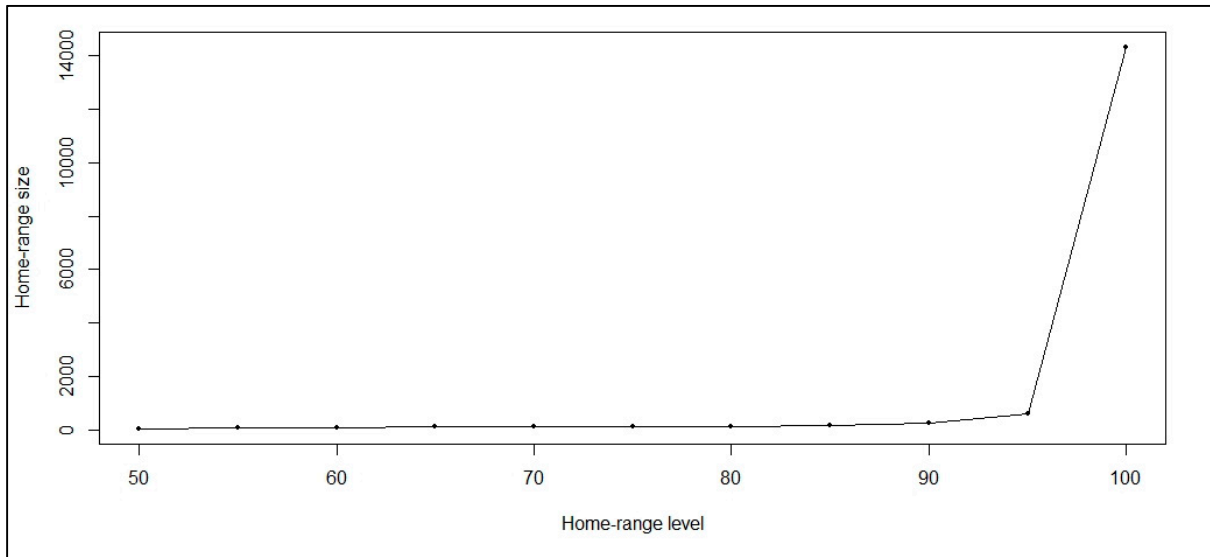

**Figure S1** Relationship between home-range size and home-range level of white-rumped vulture-1 (WRV1). X-axis represents the home-range level in percent and Y-axis represents the home-range size in km<sup>2</sup>.

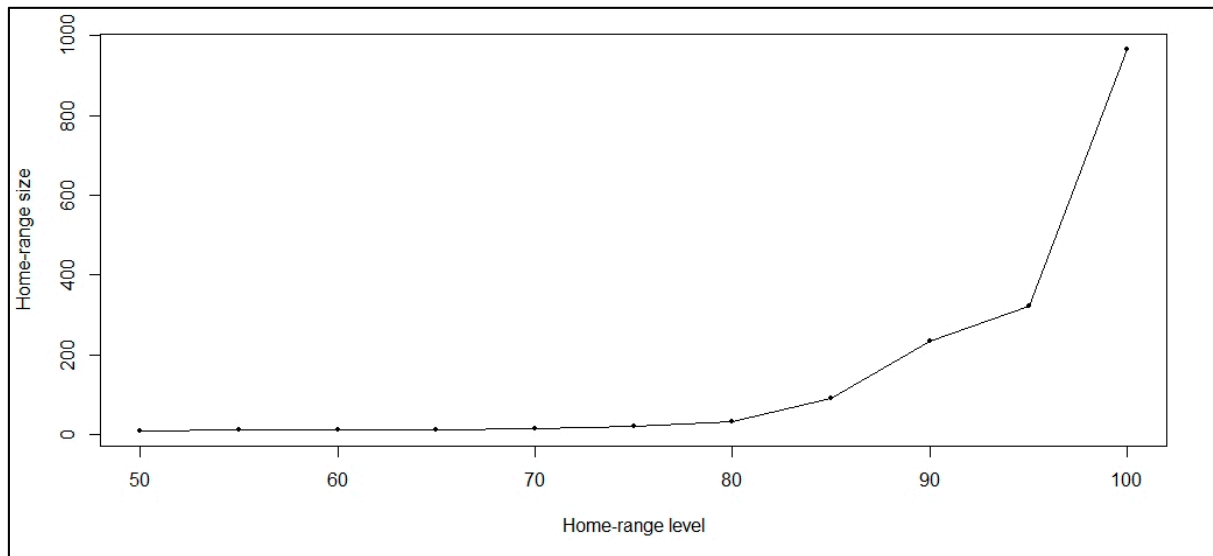

**Figure S2** Relationship between home-range size and home-range level of white-rumped vulture-2 (WRV2). X-axis represents the home-range level in percent and Y-axis represents the home-range size in km<sup>2</sup>.

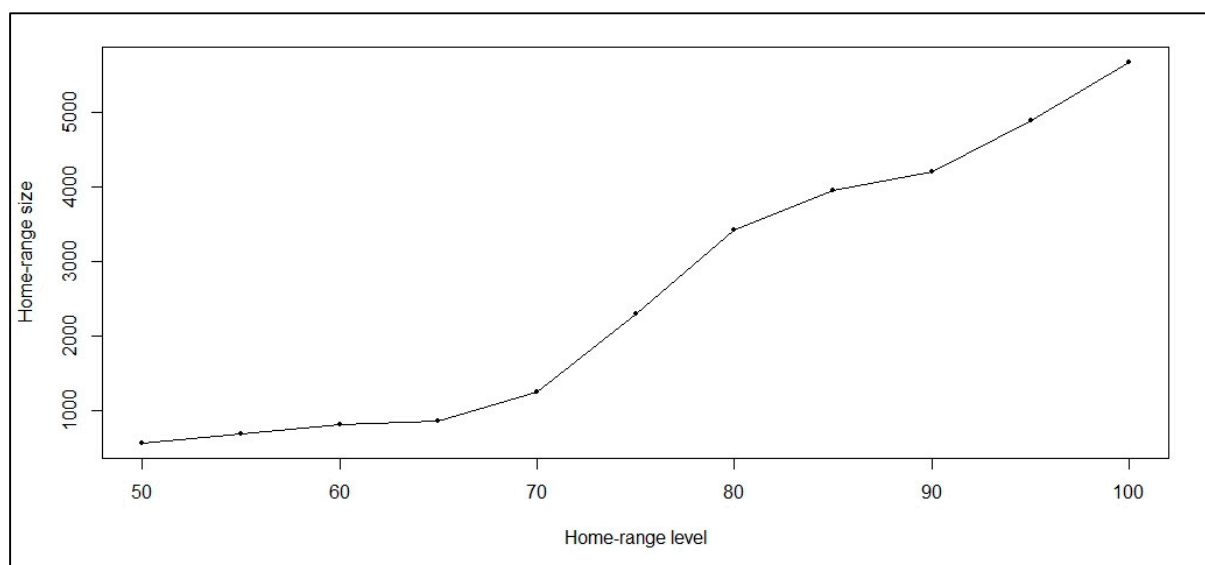

**Figure S3** Relationship between home-range size and home-range level of red-headed vulture. X-axis represents the home-range level in percent and Y-axis represents the home-range size in km<sup>2</sup>.

\*\*\*
