# Supplementary material for: Home Range, Movement and Activity Patterns of Six vulture Species Using Satellite Telemetry in Saurashtra landscape, Gujarat, India
Source: MDPI journal article supplement (doi:10.3390/ecologies3040035), 2022-10-18
Supplement: s1 [file s1]

Archive with 4 entries (4 files):
- S1_Supplementray Material S1_ Tagging_details.pdf
- S2_Supplementray Material S2_ Homaerange_plots_vs_hrangelevel.pdf
- S3_SSupplementray Material S3_homerange_polygons.pdf
- S4_Supplementray Material S4_activity patterns.pdf
