# Supplementary material for: Home Range, Movement and Activity Patterns of Six vulture Species Using Satellite Telemetry in Saurashtra landscape, Gujarat, India
Source: MDPI journal article supplement (doi:10.3390/ecologies3040035), 2022-10-18
Supplement: s1 [file s1 › S1_Supplementray Material S1_ Tagging_details.pdf]

### Supplementary Material S1

**Table S1:** Details of the tagging of eleven vulture individuals by Wildlife Division, Sasan-Gir, Gujarat Forest Department.

| Species                       | Date deployed | Place of Tagging                | Tag number | Tag Type                                       | Weight of Tag (in grams) | Weight of Bird (in grams) | Fate                          |
|-------------------------------|---------------|---------------------------------|------------|------------------------------------------------|--------------------------|---------------------------|-------------------------------|
| Indian Vulture-1 (IV1)        | 20-10-2020    | Behind GIZ Devaliya Safari Park | 191165     | Ornitela GSM (OT-E50 3G)                       | 50                       | 4765                      |                               |
| Indian Vulture-2 (IV2)        | 20-10-2020    | Behind GIZ Devaliya Safari Park | 201210     | Ornitela GSM (OT-E50 3G)                       | 50                       | 4950                      | Died on 23-05-2021            |
| Red-headed Vulture            | 22-10-2020    | GIZ Devaliya Safari Park        | 191123     | Ornitela GSM (OT-E50 3G)                       | 50                       | 3190                      |                               |
| White-rumped Vulture-1 (WRV1) | 08-11-2020    | Plantation Area, Mahuva         | 191122     | Ornitela GSM (OT-E50 3G)                       | 50                       | 4885                      |                               |
| White-rumped Vulture-2 (WRV2) | 09-11-2020    | Plantation Area, Mahuva         | 191121     | Ornitela GSM (OT-E50 3G)                       | 50                       | 5020                      | Died on 10-05-2021            |
| Indian vulture-3 (IV3)        | 10-11-2020    | Plantation Area, Mahuva         | 191164     | Ornitela GSM (OT-E50 3G)                       | 50                       | 4668                      |                               |
| Himalayan Griffon-1 (HG1)     | 14-01-2021    | GIZ Devaliya Safari Park        | 203509     | Ornitela GSM (OT-E50 3G)                       | 50                       | 8800                      | Tag malfunction on 25-03-2021 |
| Himalayan Griffon-2 (HG2)     | 14-01-2021    | GIZ Devaliya Safari Park        | 203511     | Ornitela GSM (OT-E50 3G)                       | 50                       | 7190                      |                               |
| Eurasian Griffon-1 (EUG1)     | 05-02-2021    | Plantation Area, Mahuva         | 208498     | Microwave 70 G GPS Solar (Argos Satellite Tag) | 70                       | 6490                      |                               |
| Eurasian Griffon-2 (EUG2)     | 08-02-2021    | Plantation Area, Mahuva         | 208499     | Microwave 70 G GPS Solar (Argos Satellite Tag) | 70                       | 7056                      |                               |
| Egyptian Vulture              | 22-03-2021    | GIZ Devaliya Safari Park        | 200369     | Ornitela GSM Tag (OT-20 3G)                    | 20                       | 1505                      |                               |

\*\*\*
