# Supplementary material for: Home Range, Movement and Activity Patterns of Six vulture Species Using Satellite Telemetry in Saurashtra landscape, Gujarat, India
Source: MDPI journal article supplement (doi:10.3390/ecologies3040035), 2022-10-18
Supplement: s1 [file s1 › S4_Supplementray Material S4_activity patterns.pdf]

**Supplementary Material S4: Daily activity rates of satellite tagged vultures across months.**

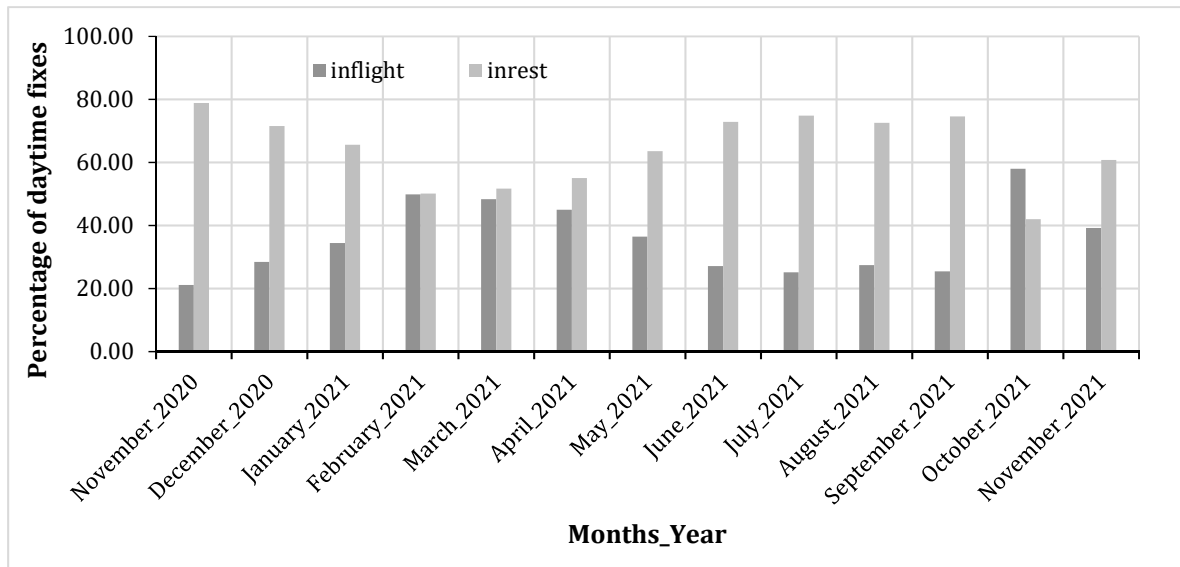

**Figure S16** Percentage of locations characterized as “in-flight” and “in-rest” by months for Indian Vulture-1 (IV1) calculated from 8,307GPS locations collected between November 1, 2020 – November 30, 2021.

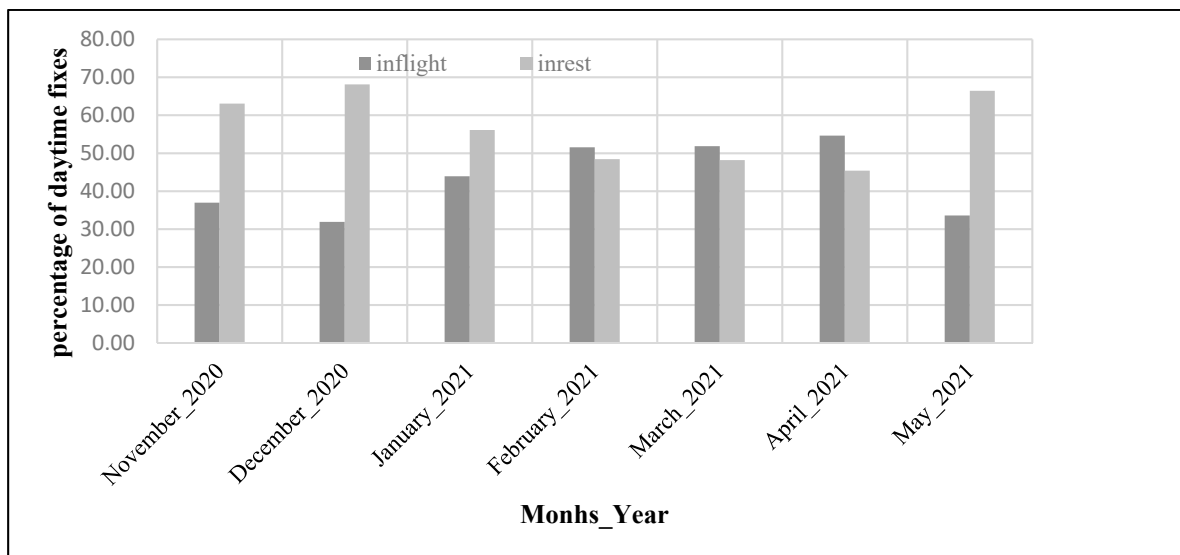

**Figure S17** Percentage of locations characterized as “in-flight” and “in-rest” by months for Indian Vulture-2 (IV2) calculated from 5,300 GPS locations collected between November 1, 2020 – May 31, 2021.

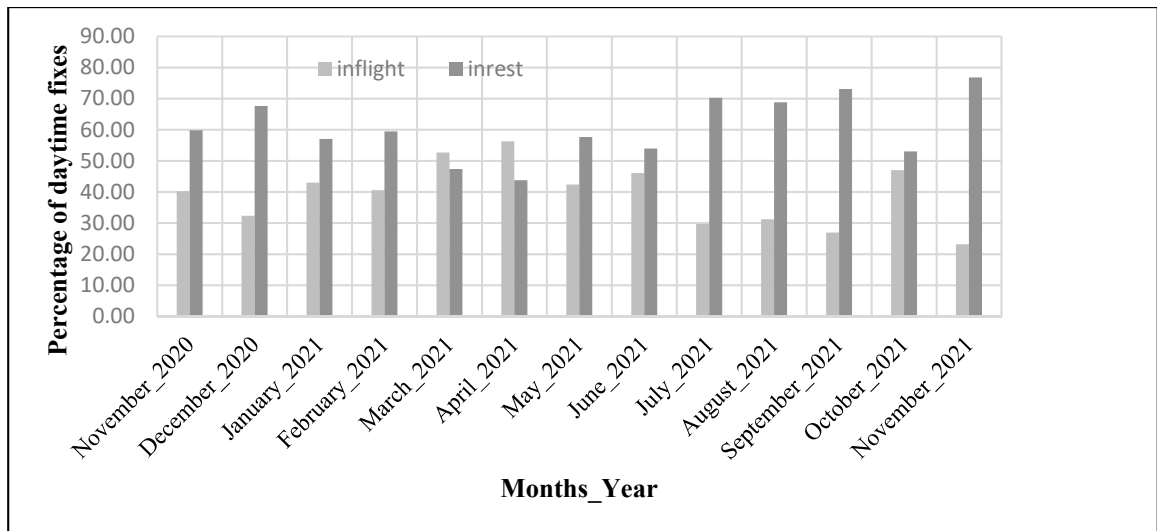

**Figure S18** Percentage of locations characterized as “in-flight” and “in-rest” by months for Indian Vulture-3 (IV3) calculated from 9,428 GPS locations collected between November 1, 2020 – November 30, 2021.

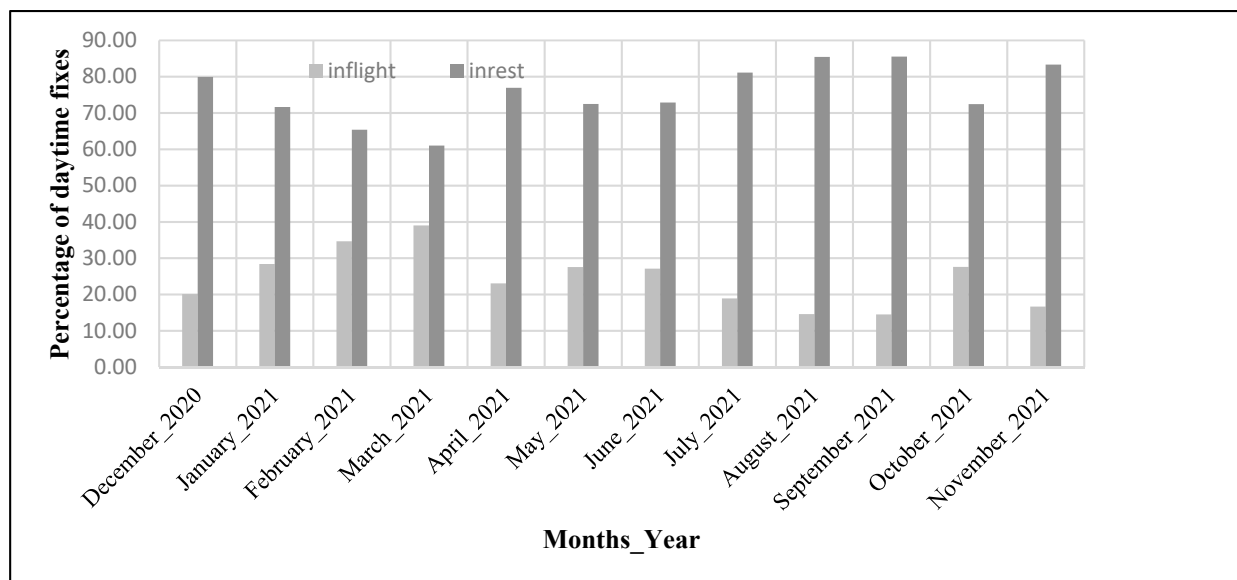

**Figure S19** Percentage of locations characterized as “inflight” and “in-rest” by months for White-rumped Vulture-1 (WRV1) calculated from 7,590 GPS locations collected between December 1, 2020 – November 30, 2021

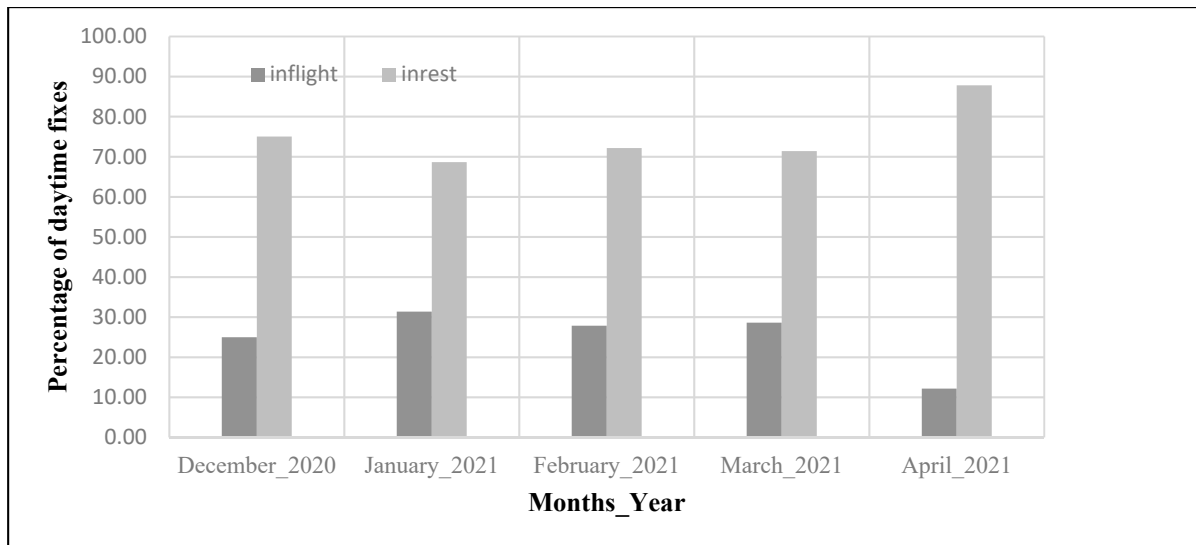

**Figure S20** Percentage of locations characterized as “in-flight” and “in-rest” by months for White-rumped Vulture-2 (WRV2) calculated from 4,532 GPS locations collected between December 1, 2020 – April 30, 2021

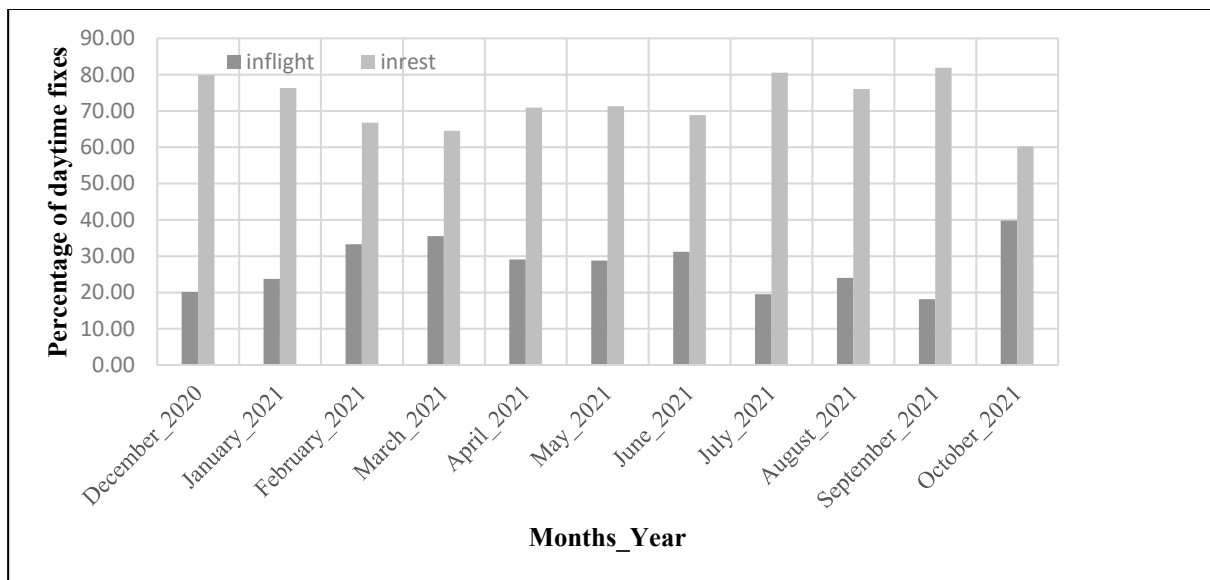

**Figure S21** Percentage of locations characterized as “in-flight” and “in-rest” by months for Egyptian Vulture calculated from 5122 GPS locations collected between March 1, 2021 – November 30, 2021

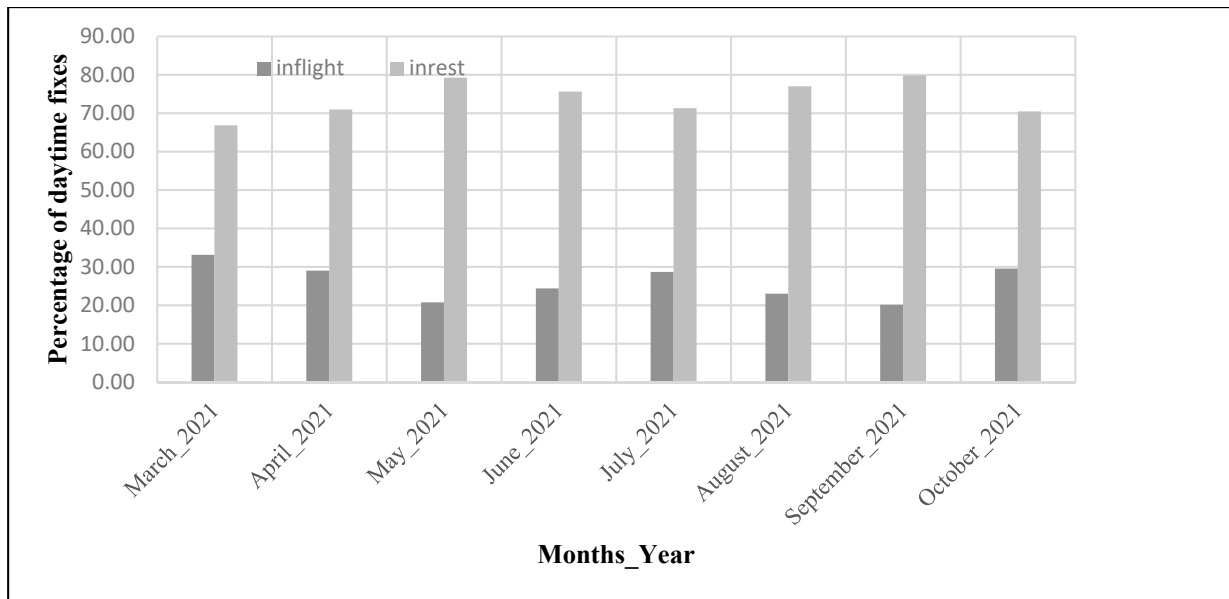

**Figure S22** Percentage of locations characterized as “in-flight” and “in-rest” by months for Red-headed Vulture calculated from 7,383 GPS locations collected between December 1, 2020 – April 30, 2021

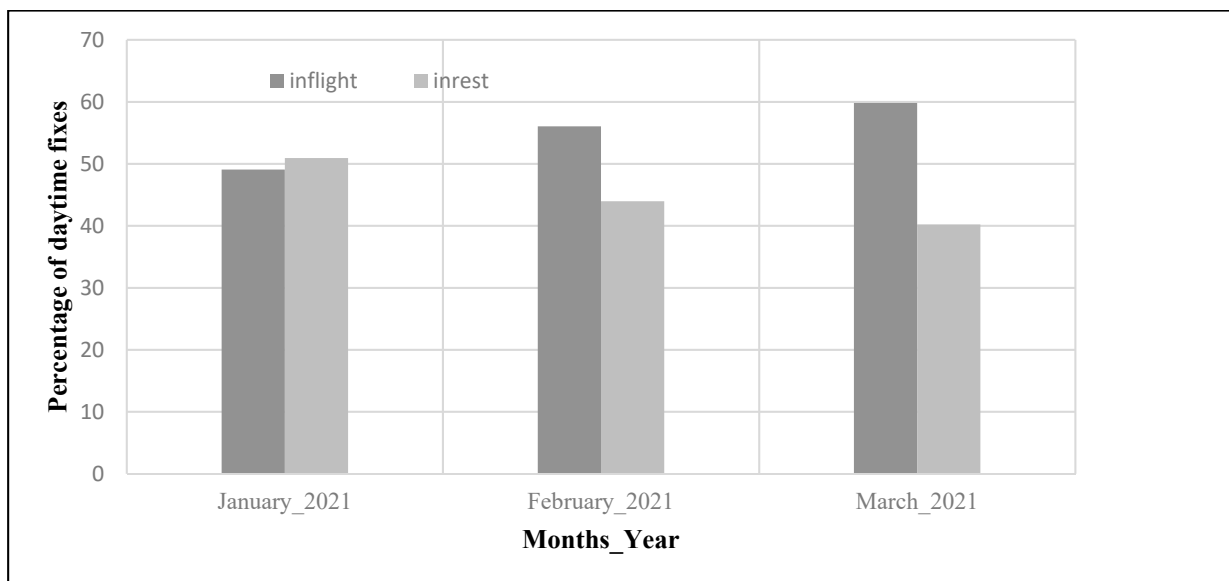

**Figure S23** Percentage of locations characterized as “in-flight” and “in-rest” by months for Himalayan Griffon-1 (HG1) calculated from 2,213 GPS locations collected between January 1, 2020 –March 23, 2021

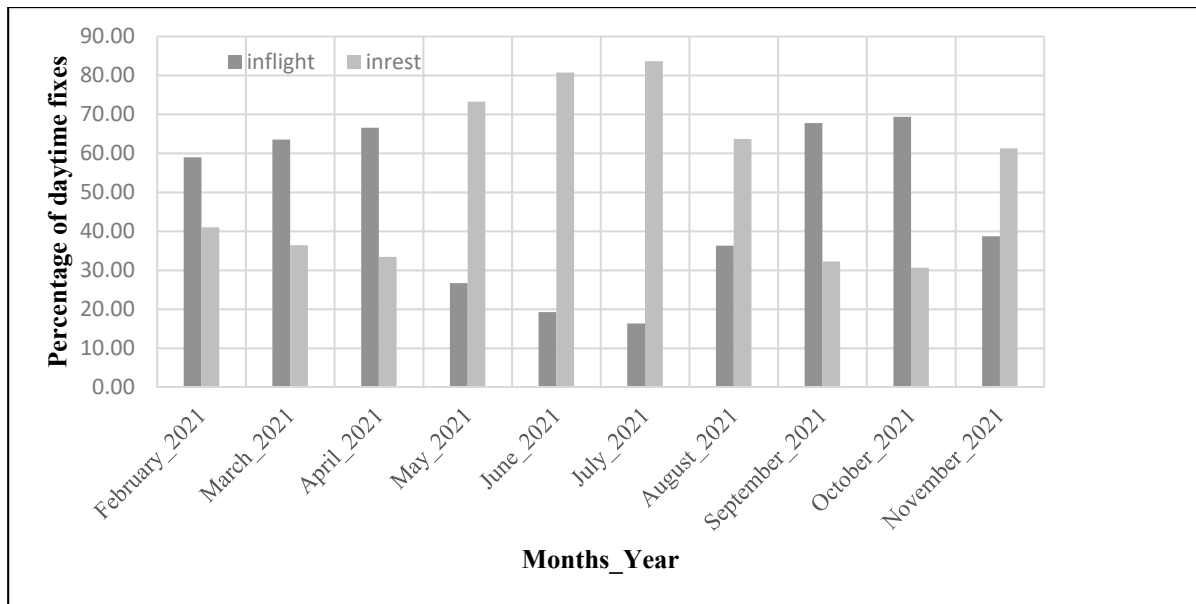

**Figure S24** Percentage of locations characterized as “in-flight” and “in-rest” by months for Himalayan Griffon-2 (HG2) calculated from 7,684 GPS locations collected between February 1, 2021 –November 30, 2021

\*\*\*
